# Supplementary material
Source: HighWire-hosted journal article supplement (https://bjsm.bmj.com/content/52/16/1031)
Supplement: inline-supplementary-material-1 [file inline-supplementary-material-1.docx]

**Search Strategy:**

1. psychology/

2. Psychosocial.ab,kf,ot,ti,tw.

3. Psychosomatic.ab,kf,ot,ti,tw.

4. Psychological.ab,kf,ot,ti,tw.

5. Psychophysiologic Disorders/

6. Kinesiophobia.ab,kf,ot,ti,tw.

7. Fear avoidance.ab,kf,ot,ti,tw.

8. Catastrophising.ab,kf,ot,ti,tw.

9. Anxiety/

10. Depression/

11. Quality of life/

12. Adaptation, Psychological/

13. Catastrophization/

14. Helplessness.ab,kf,ot,ti,tw.

15. (KOOS or AIMS2-SF or AQoL or Coping Strategies Questionnaire or CSQ or ASES or QLS or WHOQoL-Bref or SF 36 or AHI or PQOL or EQ-5D or TAMPA or

PCS).ab,kf,ot,ti,tw.

16. 1 or 2 or 3 or 4 or 5 or 6 or 7 or 8 or 9 or 10 or 11 or 12 or 13 or 14 or 15

17. Osteoarthritis, Knee/

18. (osteoarthr$ or osteo-arthr$).ab,kf,ot,ti,tw.

19. Knee.ab,kf,ot,ti,tw.

20. 17 or 18 or 19

21. 16 and 20

22. Clinical trials as topic/

23. Randomized Controlled Trial/

24. Controlled Clinical Trials as Topic/

25. Randomized controlled trial.pt.

26. Controlled clinical trial.pt.

27. randomized.ab.

28. placebo.ab.

29. randomly.ab.

30. trial.ti.

31. ((clinical or controlled or comparative or placebo or prospective* or randomi#ed) adj3 (trial or study)).ab,kf,ot,ti,tw.

32. (random* adj7 (allocat* or allot* or assign* or basis* or divid* or

order*)).ab,kf,ot,ti,tw.

33. ((singl* or doubl* or trebl* or tripl*) adj7 (blind* or mask*)).ab,kf,ot,ti,tw.

34. (cross?over* or (cross adj1 over*)).ab,kf,ot,ti,tw.

35. ((allocat* or allot* or assign* or divid*) adj3 (condition* or experiment* or

intervention* or treatment* or therap* or control* or group*)).ab,kf,ot,ti,tw.

36. 23 or 24 or 25 or 26 or 27 or 28 or 29 or 30 or 31 or 32 or 33 or 34 or 35 or 36

37. 21 and 36
