# Supplementary material
Source: HighWire-hosted journal article supplement (https://bjsm.bmj.com/content/52/16/1031)
Supplement: inline-supplementary-material-3 [file inline-supplementary-material-3.docx]

**Appendix 3 - Characteristics of excluded studies due to the primary outcome.**

Eighty studies were not included in our SR because the outcome of interest (i.e. QoL or psychosocial factors) was not reported as the main (primary) one. All these studies were RCTs investigating a variety of conservative interventions (e.g. acupuncture, exercise therapy, pharmacological, surgery, etc) on QoL or psychosocial factors of individuals with knee OA. Overall, 47 (58.8%) studies considered pain (e.g. visual analogue scale) as their primary outcome; 12 (15%) considered physical function as main outcome; 18 (22.5%) did not specify the primary outcome (not possible to identify); and three (3.7%) used other outcomes such as functional tests (single hop test), global impression of recovery and biomechanical variables. In addition, 38 studies were excluded because the primary outcome was obtained with an evaluation tool that was not designed to measure psychosocial factors or QoL. All these studies considered the WOMAC index or one of its subscales as a primary outcome.
